# Supplementary material
Source: MDPI journal article supplement (https://www.mdpi.com/2410-3888/7/1/24)
Supplement: s1 [file s1]

Archive with 3 entries (3 files):
- Figure S1 Gel.pdf
- Figure S2 cDNA (1A32).pdf
- Supplemental Table S1 CDR3.pdf
