# Supplementary material
Source: MDPI journal article supplement (https://www.mdpi.com/2410-3888/7/1/24)
Supplement: s1 [file s1 › Figure S1 Gel.pdf]

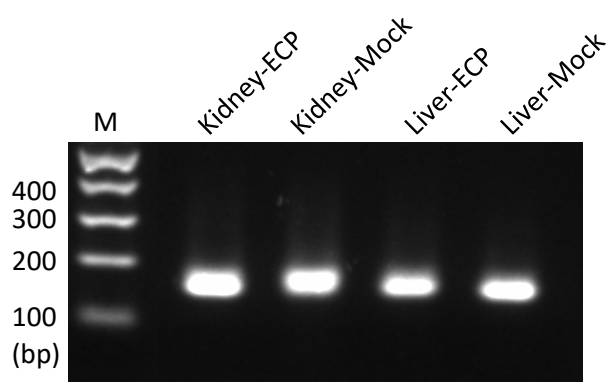

Figure S1. Analysis of qPCR amplicons. Aliquots of 2  $\mu$ l products sampled at the end of PCR cycling were separated in 2% agarose gel using 1X TAE running buffer. M: 1Kb plus DNA ladder (Invitrogen).
