# Supplementary material
Source: MDPI journal article supplement (https://www.mdpi.com/2410-3888/7/1/24)
Supplement: s1 [file s1 › Figure S2 cDNA (1A32).pdf]

AGCAGTTTGTGTGATTACAGAAACAGTAACCATTTGGAGATGGAACCTAGGCAGAGCTCTGAGTTACTTTGC<sup>72</sup>  
M E L G R A L S Y F A  
TCTAGCAACAATTATTCAATATTCTCTGCAGTCAGACACTGATTGAGTCGGAGTCAGTGATCATCAAACCTGA<sup>144</sup>  
L A T I I Q Y S C S Q T L I E S E S V I I K P D  
TCAGTCTCATAAACTGACCTGTACAGCCTCTGGATTTAACTTTGGTAACTATTACATGGCCTGGATTAGACA<sup>216</sup>  
Q S H K L T C T A S G F N F G N Y Y M A W I R Q  
GGCACCTGGAAGGGCTGGAATTTGTTGCAACTATCTCAGAAGGCAGTAGTAGCAAGTATTACTCCAGTGC<sup>288</sup>  
A P G K G L E F V A T I S E G S S S K Y Y S S A  
AGTTAATGGCCGCTTACCAGTGTCCAGAGACAACAGTAAGATGCAGGTGTATCTGTACATGACCAGTGTGAG<sup>360</sup>  
V N G R F T M S R D N S K M Q V Y L Y M T S V R  
GACAGAAGACACTGCAGTGTATTACTGCACTAGACGGACTGGGGTGTACTTTGACTACTGGGGAAAAGGAAC<sup>432</sup>  
T E D T A V Y Y C T R R T G V Y F D Y W G K G T  
TTCAGTGACCGTGACTTCAGCTGTGCAAAGCGCCCCGAAATCCCTGTTTCCCGTGTGGCAGTGGCGCTCGGC<sup>504</sup>  
S V T V T S A V Q S A P K S L F P V W Q C G S A  
CTCGGACGGTTTAGTCACTCTTGGCTGCGTCACGCGCGATTGGCCCTCCGCCGACGGACTGAGCTTCATATG<sup>576</sup>  
S D G L V T L G C V T R D L A S A D G L S F I W  
GAAGGATGCGAGCGGGAGCGCGCTGACTGACGTCGTGCAATACCCGGCGGTGCAAGCGACCGGAGGGTACAC<sup>648</sup>  
K D A S G S A L T D V V Q Y P A V Q A T G G Y T  
CTCGGTGAGCCATGTGCGCGTCAAGGCTTCTGACTGGAACGGGAACAAGAAGTTCACGTGCGAAGTCAAAAA<sup>720</sup>  
S V S H V R V K A S D W N G N K K F T C E V K N  
TGGCCTAGGATCTAAAGACGCGTCTTGCAAAAGCCAGTTGAGAGAGAGCTCCATGCATCTCTGCTTCTAAC<sup>792</sup>  
G L G S K D A S L Q K P V E R E L H A S L L L T  
AACTCCAACCCAAACAGAAATAGACAATGGAACAGCTACCTTCGTCTGCTTAGCTACACCATTTTACCTAA<sup>864</sup>  
T P T Q T E I D N G T A T F V C L A T P F S P K  
ATCACACACATTTAAGTGGACTCTTGAAAAGACAGACATCAGTAATAAGGTCAAAGAGAACATAGTAAGCCA<sup>936</sup>  
S H T F K W T L E K T D I S N K V K E N I V S Q  
GAATAAAGGTAAGTTCAGTCCATAAGTGTTTGGAACTCAGCGCCAGTGAATGGACAAGCTCAACTTCTCC<sup>1008</sup>  
N K G N F T A I S V L E L S A S E W T S S T S P  
AGTTAAGTGCGAATTCCAGCAGAAGAACCATAATGTGTTCAAAGAAGCGAGTTATGCACCAGGTGACACAAA<sup>1080</sup>  
V K C E F Q Q K N H N V F K E A S Y A P G D T K  
ACAGCCACAGGTGAAAATAACTGGACCTTCCACCGAGGACATTCTGATCAAAAGAGCCGGCCAGCTCGAGTG<sup>1152</sup>  
Q P Q V K I T G P S T E D I L I K R A G Q L E C  
CAGGGCCGAGGGAGACACGGGTTTCAAGAGCATTAAATGGCTTATTGGAATAGAGAGATCTCTTCTCTATC<sup>1224</sup>  
R A E G D T G F K S I K W L I G N R E I S S L S  
AAATCTATCTTCGAAAACGACGGTTTCACTCCAAACCCACATCGGTTTCGAAGAGTGGATCAATGGCACCGA<sup>1296</sup>  
N L S S K T T V S L Q T H I G F E E W I N G T E  
ATTATCTGTGAGGTGGAACATGAAGCATTCACTCAACAGTATGAAAAGTAACCTTCAAAGAGAAAAATGG<sup>1368</sup>  
F I C E V E H E A F T Q Q Y E K V T F K R E N G  
CAATCCGGAATTCCCCAAGGTTTACTTGCTCGCTCCACCAGAGAGCTCTGGTGAATCAGTGACCCTGACTTG<sup>1440</sup>  
N P E A F P K V Y L L A P P E S S G E S V T L T C  
CTATGTAAAGACTTCTACCCTAAGGAGGTGGCTGTGTCTTGGCTTGTTAACGATAAAACAAGTGAAGAAGT<sup>1512</sup>  
Y V K D F Y P K E V A V S W L V N D K Q V E E V  
GGTCGGCTATGAGCAGAACCAGTGCAGTTATCGACAGAAACAACCTCTTTTTCAGTGACAGCCAGCTGAT<sup>1584</sup>  
V G Y E Q N T T A V I D R N N L F S V Y S Q L I  
TATCAAACTGCAGACTGGAACAGTGGCAGTGTGTTTTCAGCTGCCTGGTTTATCATGAGTCCATCAAGGACTG<sup>1656</sup>  
I K T A D W N S G S V F S C L V Y H E S I K D C  
TGTGCGCCCATATCCAGATCCATCGCTAAAGATTCAAAAACGCCACCTTAGTGAATCTCACCTTGACCAA<sup>1728</sup>  
V R P I S R S I A K D S K T P T L V N L T L T N  
TCCCCAATCTTGCTCTTGCTCTACGTATTAGAATTTGTGTTGTCTGCTATTAATGCTTGATTTATTTTAATT<sup>1800</sup>  
P Q S C S C S T Y \*  
TTTGCCTCATCTTTTATGTCTTTTTTTTTTTTTTATTAATGCAATGTCAATTGTCTTGATGTCTGTCTGATGCTTG<sup>1872</sup>  
TATGTCTTGGTTTTTGGAAACATGTCTAATGCAATAATACACTGAAACAATGACAATAAAAAATCCTTCAG<sup>1944</sup>  
CATGTACAAAAA  
1980

Figure S2. The full-length cDNA sequence and translated amino acid of catfish IgM heavy chain (variant 1A32). 5' and 3'-untranslated sequences were shown in italic. The stop codon was marked as asterisk. The poly-A signal was underlined.
