# Supplementary material
Source: MDPI journal article supplement (https://www.mdpi.com/2410-3888/7/1/24)
Supplement: s1 [file s1 › Supplemental Table S1 CDR3.pdf]

Table S1. The third complementarity region (CDR3) of IgM heavy chain variable domain (IGHV) identified in this study

| Variants           | Catfish<br>IGHV <sup>1</sup> | Human<br>IGHV <sup>2</sup> | CDR3 nucleotide sequence <sup>3</sup><br>(V region end/V-D junction/D region/D-J junction/J start) | CDR3<br>Amino Acid |
|--------------------|------------------------------|----------------------------|----------------------------------------------------------------------------------------------------|--------------------|
| 1C17               | 1                            | 3-66*02                    | GC/ACGAG/AACTCC/TGGGGCC/CTTTGACTAC                                                                 | ARELLGP FDY        |
| 4D9                | 1                            | 3-74*03                    | CA/CGCCGG/GGTGG/CACGAAA/TACTTTGACTAC                                                               | ARRGGTKY FDY       |
| 1E12               | 2                            | 3-11*04                    | GA/x/x/TACCGCGGGCCCG/ACTACTTTGACTAC                                                                | VRVRGPDY FDY       |
| (2B1) <sup>4</sup> | 2                            | 3-11*04                    | AG/GCGAGGGG/GTGGCTA/TGGGCT/TTTGATTAC                                                               | ARGEGVAMG FxL      |
| 3D12               | 2                            | 3-11*04                    | AG/TACGAG/GGGGGA/TCAG/CTACTTTGACTAC                                                                | ARVRGGISY FDY      |
| 2E5                | 2                            | 3-11*04                    | GC/AAAAAT/AGCAGCTGG/AAGGTGGGCT/TTTGATTAC                                                           | AKIAAGRWA FDY      |
| 1E5                | 2                            | 3-11*06                    | GC/ACTTAGG/GGCTGG/ACT/TTTGATTAC                                                                    | ALRGWT FDY         |
| 1E8                | 2                            | 3-11*06                    | GA/AAGGAA/TATAAC/GAAGGTGCT/TTTGATTAC                                                               | ARKEYNEGA FDY      |
| 1E3                | 2                            | 3-13*01                    | GAG/GGCCCTTCCTC/CTACG/A/CTACTTTGACTAC                                                              | ARGPSSYDY FDY      |
| 1-35               | 2                            | 3-38*03                    | GA/CGG/CCAGCTG/GGAGAGGGGGG/GCTTTTGAT                                                               | ARRPAGRGA FDY      |
| 1E2                | 2                            | 3-38*03                    | GA/ACTTC/CTACG/A/CTACTTTGACTAC                                                                     | ARTSYDY FDY        |
| 1E6                | 2                            | 3-38*03                    | AT/CGGGTAGGGTGG/ATTATAA/TGCT/TTTGGCTAC                                                             | ARSGRVLYNA FGY     |
| (1E9)              | 2                            | 3-38*03                    | GA/GGTT/TGGCTACG/GCTTTAAGCT/TTTGGCTAC                                                              | LEVWLRLLxA FGY     |
| 2E9                | 2                            | 3-38*03                    | TA/x/x/GCGGG/TACTTTGACTAC                                                                          | ARYSGY FDY         |
| 3D8                | 2                            | 3-38*03                    | AA/GA/ACTAC/CTACG/ACTACTTTGACTAC                                                                   | ARTTYDY FDY        |
| 1C8                | 2                            | 3-48*01                    | GC/AGGATTC/GATGGC/GCCGATCTCGCTTTTGG/CTAC                                                           | AGFDGADLA FGY      |
| 3B46               | 2                            | 3-48*03                    | GA/x/CTACTAC/G/ACTACTTTGACTAC                                                                      | ARDYYDY FDY        |
| 3B44               | 2                            | 3-53*03                    | GG/GTGGCAGTA/ATGCT/T/TTGACTAC                                                                      | ARGGSNA FDY        |
| 3D13               | 2                            | 3-64*04                    | AG/GGCCCTTCCTC/CTACG/A/CTACTTTGACTAC                                                               | ARGPSSYDY FDY      |
| 3D4                | 2                            | 3-64*04                    | AG/GGGG/TACTAC/x/GATGCTTTTGAT                                                                      | ARGYYDA FDY        |
| 1B15               | 2                            | 3-66*01                    | GC/AGAAAGTATCGGCAC/CTGGA/GG/TTTGACTAC                                                              | AESIGTWR FDY       |
| 1E4                | 2                            | 3-66*01                    | GC/AGAAAGTATCG/GCAGCTGG/AGG/TTTGACTAC                                                              | AESIGSWR FDY       |
| 1E7                | 2                            | 3-66*01                    | GC/AGAAAGTATCG/GCAGCTGG/AGG/TTTGACTAC                                                              | AESIGSWR FDY       |
| 2E2                | 2                            | 3-66*01                    | GC/AAAT/ACTGGGG/TGGCACTCTATAATGCT/TTTGGCTA                                                         | ANTGVALYNA FGY     |
| 3B42               | 2                            | 3-66*01                    | AG/GGGTA/TTGGGGG/CTCTTGAT/TTTGATTAC                                                                | ARGVLGALD FDY      |
| 3B43               | 2                            | 3-66*01                    | GA/TCCCCGAATGGGA/ATGCT/T/TTGACTAC                                                                  | ARSPNGNA FDY       |
| 3D14               | 2                            | 3-66*01                    | GA/TCCCCGAATGGGA/ATGCT/T/TTGACTAC                                                                  | ARSPNGNA FDY       |
| 3D6                | 2                            | 3-66*01                    | GA/x/TCGGGG/GTGGCACTA/TACTTTGACTAC                                                                 | ARSGVALY FDY       |
| 3D9                | 2                            | 3-66*01                    | GA/T/TGGATAT/CGCTT/ACTACTTTGAGTAC                                                                  | ARLDIAYY FEY       |
| 1E10               | 5                            | 2-5*02                     | GC/TCGTTTCCC/CAGCAGCTGG/AGTAGCGGGT/ACTACTT                                                         | ARFPSSWSSGYFDY     |
| 2E3                | 3                            | 3-21*02                    | GA/C/GTAGC/GGGA/ACTACTTTGACTAC                                                                     | TRRSGNY FDY        |
| 1A32               | 3                            | 3-30*03                    | GA/CGG/ACTGGGG/TG/TACTTTGACTAC                                                                     | TRRTGVY FDY        |
| 1A53               | 3                            | 3-30*03                    | GA/AGA/GCGACTA/AC/TACTTTGACTAC                                                                     | TRRATNY FDY        |
| 2E1                | 3                            | 3-64*04                    | GC/CCGTGACCCCACTC/ACTACGG/ACG/CTTTGACTAC                                                           | ARDPTHYGR FDY      |
| 4-7                | 4                            | 3-33*03                    | GC/ACCCGCCTTTATAGC/TGGGGTAGTTAT/AATGCT/TTT                                                         | TRLYSWGSYNA FDY    |
| (1C14)             | 5                            | 2-5*02                     | GC/TCGTTTCCGGG/TCGGGG/CGGCGA/GACTAC                                                                | ARFRVGAARL x       |
| 2E13               | 5                            | 2-70*02                    | TG/CGCTCGTGAAGCCA/ACTACGG/CGCCAGGACGGTGCT/TTT                                                      | ARGSQLRRQDGA FDY   |
| 4B42               | 5                            | 2-70*10                    | TG/GTCGTGGGGGGGGCCTGGGGTGGCAC/TATGCT/T/TTG                                                         | GRGGGLGWHYA FDY    |
| 4B47               | 5                            | 2-70*10                    | TG/GTCGTGGGGGGGGCCTGGGGTGGCACTATGCT/T/TTG                                                          | GRGGGLGWHYA FDY    |
| 3C8                | 6                            | 1-2*02                     | GC/CCGGCG/GTACCA/CGCT/TTTGACTAC                                                                    | ARRYHA FDY         |
| 3D7                | 6                            | 1-2*02                     | GC/TCGGCAGGC/GGCTACGA/CGG/ACTTTGACTAC                                                              | ARQAATTD FDY       |
| 1E11               | 6                            | 1-18*04                    | GC/TCGTGGG/GCATAT/AGCGC/CTTTGACTAC                                                                 | ARGAYSA FDY        |
| 2-12               | 6                            | 1-46*03                    | GA/AGAGGGG/GGTGG/CACG/TACTTTGACTAC                                                                 | AREEGGGTY FDY      |
| 2E8                | 6                            | 1-46*03                    | GA/A/CAGCAGCTGG/AA/TACTTTGACTAC                                                                    | AREQQLEY FDY       |
| 3D5                | 6                            | 1-46*03                    | CT/CGTGCGAGTC/ACTACGG/x/CTTTGACTAC                                                                 | ARASHYG FDY        |
| 1B32               | 6                            | 2-70*02                    | TG/CGCTCGTGAACGAG/ACGGTGG/CGATGCT/TTTGGCTA                                                         | ARERDGGDA FGY      |
| 4B41               | 6                            | 3-66*01                    | GC/TCGTGAACC/CTGGGG/TGTCCGTGCT/TTTGATTAC                                                           | AREPWGVRA FDY      |
| 4D4                | 6                            | 3-66*01                    | GC/(GC)/TCGTC/AGGGGGTCGCT/TTTGACTAC                                                                | ARQGVFA FDY        |
| 2E-1               | 6                            | 3-66*04                    | CG/(AC)/TGGGG/GGGTCCG/ACTACTTTGACTAC                                                               | ARLGGSYD FDY       |
| 1B31               | 7                            | 3-69-1*02                  | GC/CCGACGGTATG/GCAGCTGG/AG/CTACTTTGACTAC                                                           | ARRYGSWSY FDY      |

|     |    |         |                                    |          |     |
|-----|----|---------|------------------------------------|----------|-----|
| 3D3 | 9  | 1-46*03 | GA/ACTG/GCAGCGG/GTATT/TTTGACTAC    | ARELAAGI | FDY |
| 1E1 | 12 | 4-59*03 | TG/CACACGAGT/TAAGTGGG/CT/TTTGATTAC | TRVNW    | FDY |

<sup>1</sup> The family grouping was based on Bengtén, E., Clem, L.M., Miller, N.W., Warr, G.W., Wilson, M. 2006. Channel catfish immunoglobulins: Repertoire and expression. *Developmental & comparative Immunology*. 30:77-92.

<sup>2</sup> The grouping and identification of variable (V), diversity (D), and joint (J) gene segments in CDR3 was based on Ye, J., Ma, N., Madden, T.L., Ostell, J.M. 2013. IgBLAST: an immunoglobulin variable domain sequence analysis tool. *Nucleic Acid Research* 41:w34-40.

<sup>3</sup> The missing site in CDR3 sequence (or having a stop codon) was marked by x.

<sup>4</sup> Variants with parentheses were pseudogenes; they either have a stop codon or are out of translational frame.
